# Supplementary material for: Association of biological aging with prostate cancer: insights from the National Health and Nutrition Examination Survey
Source: PubMed Central journal article supplement (PMC11502538; doi:10.1007/s40520-024-02861-0), 2024-10-24

**Figure S1**

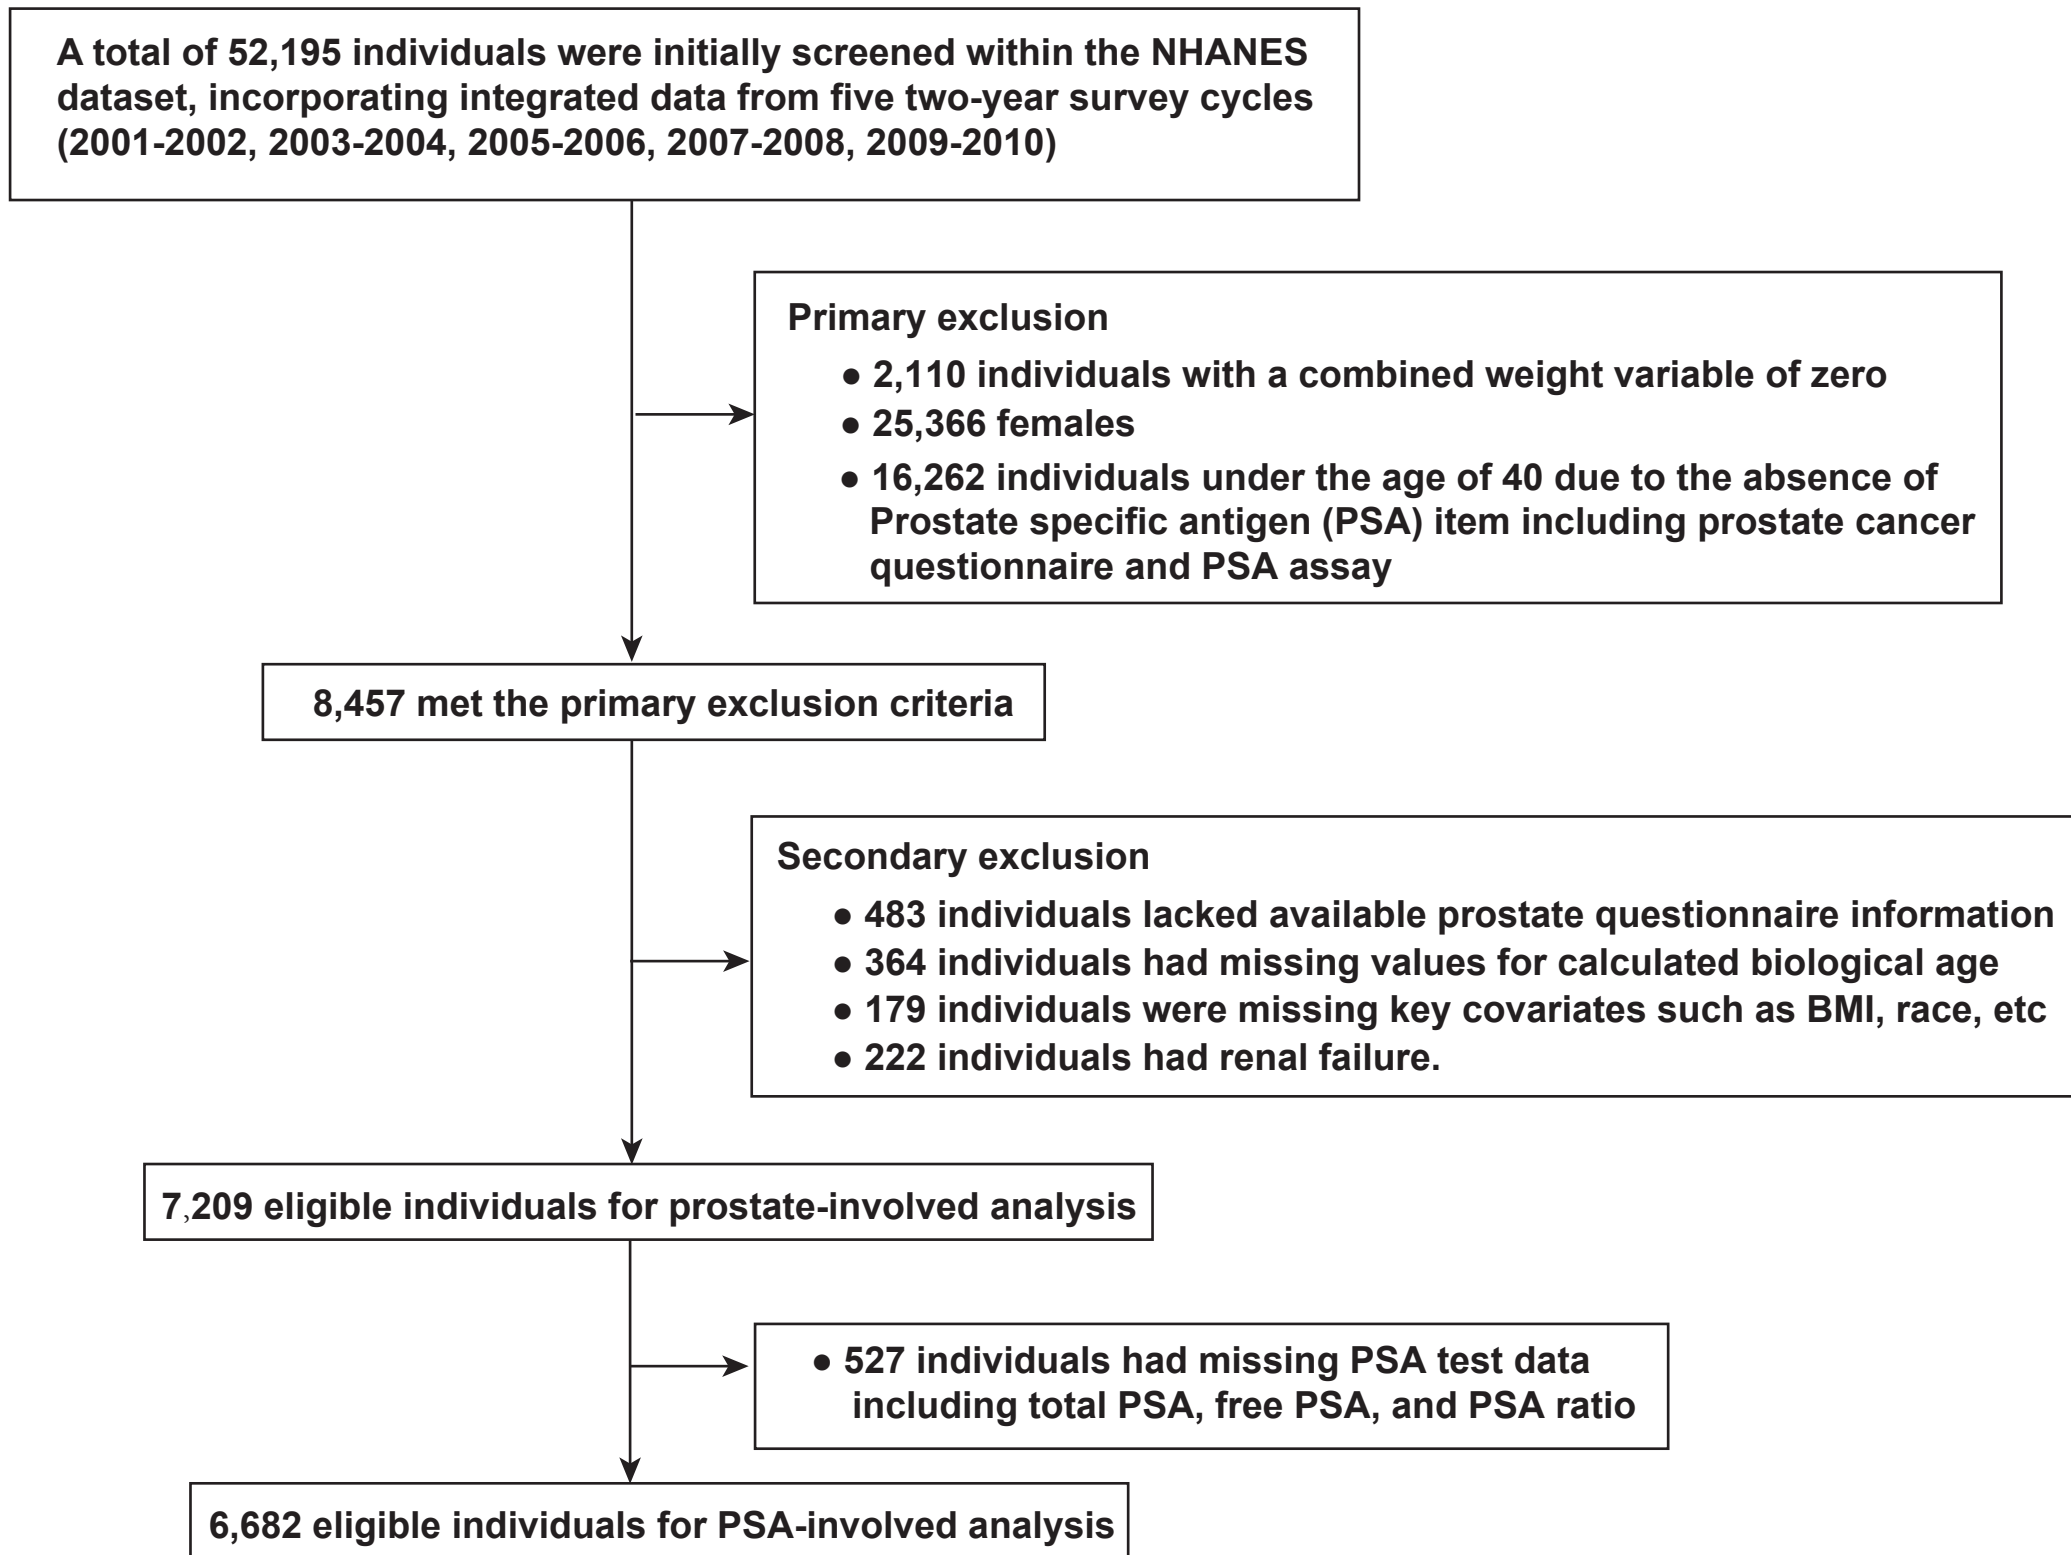

Supplement: 40520_2024_2861_MOESM1_ESM.pdf [file 40520_2024_2861_MOESM1_ESM.pdf]
